# Supplementary material for: Protein Function Prediction Based on PPI Networks: Network Reconstruction vs Edge Enrichment
Source: PubMed Central journal article supplement (PMC8712557; doi:10.3389/fgene.2021.758131), 2021-12-14
Supplement: DataSheet1.pdf [file DataSheet1.pdf]

# Supplementary Material

## 1 SUPPLEMENTARY TABLES AND FIGURES

Due to the limitation of article length, some experimental results are presented below. Table. S1 and Table. S2 represent the statistical information of data sets A and B, respectively. Based on the same experimental data set (Dataset A: *S.cerevisiae*), Table. S3, Table. S4 and Table. S5 indicate the performance differences between similarity indices, the effect of the number of similarity-inferred edges  $k$  and that of the parameter  $\lambda$ , respectively.

### 1.1 Tables

**Table S1.** Statistics of Dataset A.

| Namespaces         | <i>S.cerevisiae</i> |              | <i>M.musculus</i> |              |
|--------------------|---------------------|--------------|-------------------|--------------|
|                    | proteins            | interactions | proteins          | interactions |
| molecular function | 1147                | 20013        | 715               | 1855         |
| biological process | 3277                | 54983        | 1046              | 2729         |
| cellular component | 4497                | 74422        | 1406              | 3614         |

**Table S2.** Statistics of Dataset B.

| MIPS Functional Category                                         | CYGD | MfunGD |
|------------------------------------------------------------------|------|--------|
| 01 METABOLISM                                                    | 942  | 2662   |
| 02 ENERGY                                                        | 151  | 603    |
| 04 STORAGE PROTEIN                                               | 0    | 0      |
| 10 CELL CYCLE AND DNA PROCESSING                                 | 1010 | 1113   |
| 11 TRANSCRIPTION                                                 | 1078 | 2119   |
| 12 PROTEIN SYNTHESIS                                             | 480  | 490    |
| 14 PROTEIN FATE                                                  | 1155 | 2484   |
| 16 PROTEIN WITH BINDING FUNCTION OR COFACTOR REQUIREMENT         | 1049 | 8369   |
| 18 REGULATION OF METABOLISM AND PROTEIN FUNCTION                 | 249  | 1112   |
| 20 CELLULAR TRANSPORT, TRANSPORT FACILITIES AND TRANSPORT ROUTES | 1042 | 2407   |
| 30 CELLULAR COMMUNICATION/SIGNAL TRANSDUCTION MECHANISM          | 234  | 4061   |
| 32 CELL RESCUE, DEFENSE AND VIRULENCE                            | 554  | 769    |
| 34 INTERACTION WITH THE ENVIRONMENT                              | 463  | 1486   |
| 36 SYSTEMIC INTERACTION WITH THE ENVIRONMENT                     | 0    | 2073   |
| 38 TRANSPOSABLE ELEMENTS, VIRAL AND PLASMID PROTEINS             | 120  | 11     |
| 40 CELL FATE                                                     | 273  | 1312   |
| 41 DEVELOPMENT (Systemic)                                        | 69   | 1042   |
| 42 BIOGENESIS OF CELLULAR COMPONENTS                             | 863  | 979    |
| 43 CELL TYPE DIFFERENTIATION                                     | 452  | 370    |
| 45 TISSUE DIFFERENTIATION                                        | 0    | 426    |
| 47 ORGAN DIFFERENTIATION                                         | 0    | 559    |
| 70 SUBCELLULAR LOCALIZATION                                      | 0    | 9739   |
| 73 CELL TYPE LOCALIZATION                                        | 0    | 273    |
| 75 TISSUE LOCALIZATION                                           | 0    | 366    |
| 77 ORGAN LOCALIZATION                                            | 0    | 619    |

**Table S3.** Comparison of performance differences between similarity indices (Dataset A: *S.cerevisiae*).

| Indices  | molecular function |              | biological process |              | cellular component |              |
|----------|--------------------|--------------|--------------------|--------------|--------------------|--------------|
|          | 1st                | 2nd          | 1st                | 2nd          | 1st                | 2nd          |
| Origin   | 1.083              | 0.136        | 0.587              | 0.190        | 0.923              | 0.408        |
| CN       | 0.493              | 0.163        | 0.370              | 0.136        | 0.528              | 0.266        |
| Jaccard  | 0.885              | <b>0.176</b> | 0.493              | 0.163        | 0.982              | 0.408        |
| FS       | <b>1.041</b>       | 0.149        | <b>0.613</b>       | <b>0.220</b> | <b>1.003</b>       | <b>0.449</b> |
| CN+      | 0.887              | 0.191        | 0.492              | 0.205        | 0.818              | 0.389        |
| Jaccard+ | 1.043              | <b>0.203</b> | 0.563              | 0.187        | <b>1.128</b>       | 0.429        |
| FS+      | <b>1.222</b>       | 0.176        | <b>0.639</b>       | <b>0.235</b> | 1.086              | <b>0.493</b> |
| Katz     | 0.923              | 0.169        | 0.471              | <b>0.192</b> | 0.881              | 0.351        |
| RWR      | <b>0.961</b>       | <b>0.176</b> | <b>0.563</b>       | 0.176        | <b>0.961</b>       | <b>0.408</b> |
| Katz+    | 1.128              | <b>0.193</b> | 0.570              | 0.217        | 0.924              | 0.370        |
| RWR+     | <b>1.273</b>       | 0.190        | <b>0.613</b>       | <b>0.220</b> | <b>1.000</b>       | <b>0.446</b> |

**Table S4.** The effect of the number of similarity-inferred edges  $k$  (Dataset A: *S.cerevisiae*).

| Indices  | molecular function |              | biological process |              | cellular component |              |
|----------|--------------------|--------------|--------------------|--------------|--------------------|--------------|
|          | 1st                | 2nd          | 1st                | 2nd          | 1st                | 2nd          |
| Origin   | 1.083              | 0.136        | 0.587              | 0.190        | 0.923              | 0.408        |
| BLAST 1  | 0.923              | 0.113        | 0.471              | 0.087        | 0.563              | 0.177        |
| BLAST 5  | 1.128              | 0.123        | <b>0.515</b>       | 0.120        | <b>0.754</b>       | <b>0.297</b> |
| BLAST 10 | <b>1.147</b>       | <b>0.138</b> | 0.493              | 0.139        | 0.724              | 0.289        |
| BLAST 15 | 1.040              | 0.122        | 0.447              | <b>0.150</b> | 0.696              | 0.282        |
| BLAST+1  | 1.439              | 0.219        | 0.689              | 0.190        | 1.010              | 0.429        |
| BLAST+5  | <b>1.703</b>       | 0.250        | <b>0.818</b>       | <b>0.239</b> | 1.174              | <b>0.493</b> |
| BLAST+10 | 1.630              | <b>0.265</b> | 0.786              | 0.206        | <b>1.225</b>       | 0.467        |
| BLAST+15 | 1.615              | 0.239        | 0.754              | 0.224        | 1.130              | 0.449        |
| FS 10    | 0.924              | 0.159        | 0.495              | 0.196        | 0.885              | 0.370        |
| FS 30    | <b>1.041</b>       | 0.146        | <b>0.613</b>       | <b>0.220</b> | 1.003              | <b>0.449</b> |
| FS 50    | 1.010              | <b>0.161</b> | 0.587              | 0.213        | <b>1.040</b>       | 0.425        |
| FS 100   | 0.963              | 0.152        | 0.563              | 0.207        | 0.981              | 0.429        |
| FS+10    | 1.130              | 0.155        | 0.580              | 0.204        | 1.035              | 0.437        |
| FS+30    | 1.222              | <b>0.176</b> | <b>0.639</b>       | <b>0.235</b> | <b>1.086</b>       | <b>0.493</b> |
| FS+50    | <b>1.243</b>       | 0.167        | 0.622              | 0.220        | 1.031              | 0.472        |
| FS+100   | 1.235              | 0.161        | 0.610              | 0.232        | 1.042              | 0.440        |
| RWR 10   | 0.639              | 0.126        | 0.374              | 0.116        | 0.657              | 0.356        |
| RWR 30   | <b>0.961</b>       | 0.176        | <b>0.563</b>       | <b>0.176</b> | <b>0.961</b>       | <b>0.408</b> |
| RWR 50   | 0.923              | <b>0.185</b> | 0.519              | 0.139        | 0.875              | 0.380        |
| RWR 100  | 0.864              | 0.173        | 0.470              | 0.151        | 0.827              | 0.357        |
| RWR+10   | 1.033              | 0.145        | 0.538              | 0.176        | 0.852              | 0.415        |
| RWR+30   | <b>1.273</b>       | 0.190        | <b>0.613</b>       | <b>0.220</b> | <b>1.000</b>       | 0.446        |
| RWR+50   | 1.222              | <b>0.205</b> | 0.587              | 0.192        | 0.967              | 0.420        |
| RWR+100  | 1.150              | 0.176        | 0.552              | 0.216        | 0.910              | <b>0.461</b> |

**Table S5.** The effect of the parameter  $\lambda$  (Dataset A: *S.cerevisiae*).

| Indices   | molecular function |              | biological process |              | cellular component |              |
|-----------|--------------------|--------------|--------------------|--------------|--------------------|--------------|
|           | 1st                | 2nd          | 1st                | 2nd          | 1st                | 2nd          |
| Origin    | 1.083              | 0.136        | 0.587              | 0.190        | 0.923              | 0.408        |
| BLAST+0.1 | 1.273              | 0.178        | 0.617              | 0.195        | 0.873              | 0.378        |
| BLAST+0.3 | 1.513              | 0.226        | 0.692              | 0.210        | 1.053              | 0.445        |
| BLAST+0.5 | 1.630              | <b>0.267</b> | 0.781              | 0.223        | 1.133              | 0.407        |
| BLAST+0.7 | <b>1.703</b>       | 0.250        | <b>0.818</b>       | <b>0.239</b> | <b>1.174</b>       | <b>0.493</b> |
| BLAST+0.9 | 1.381              | 0.197        | 0.648              | 0.201        | 0.983              | 0.429        |
| FS+0.1    | 1.053              | 0.143        | 0.609              | 0.220        | 1.037              | 0.438        |
| FS+0.3    | 1.133              | 0.161        | 0.641              | 0.239        | 1.093              | 0.417        |
| FS+0.5    | 1.174              | <b>0.196</b> | <b>0.673</b>       | <b>0.261</b> | 0.995              | 0.468        |
| FS+0.7    | <b>1.222</b>       | 0.176        | 0.639              | 0.235        | <b>1.086</b>       | <b>0.493</b> |
| FS+0.9    | 1.103              | 0.150        | 0.597              | 0.209        | 0.987              | 0.438        |
| RWR+0.1   | 1.013              | 0.186        | 0.562              | 0.178        | 0.923              | 0.415        |
| RWR+0.3   | 1.090              | <b>0.210</b> | 0.589              | 0.202        | 0.955              | 0.409        |
| RWR+0.5   | 1.207              | 0.202        | 0.627              | <b>0.245</b> | 0.943              | 0.431        |
| RWR+0.7   | <b>1.273</b>       | 0.190        | <b>0.673</b>       | 0.220        | <b>1.000</b>       | <b>0.446</b> |
| RWR+0.9   | 1.123              | 0.151        | 0.567              | 0.192        | 0.978              | 0.390        |
